# Genomic evidence of paternal genome elimination in globular springtails

Kamil S. Jaron<sup>1,\*</sup>, Christina N. Hodson<sup>1</sup>, Jacintha Ellers<sup>2</sup>, Stuart JE Baird<sup>3</sup>, Laura Ross<sup>1</sup>

5 <sup>1</sup>Institute of Evolutionary Biology, University of Edinburgh, Edinburgh, EH9 3JT, UK

<sup>2</sup>Department of Ecological Science, Vrije Universiteit Amsterdam, Faculty of Science, Amsterdam, 1081 HV, NL

<sup>3</sup>Institute of Vertebrate Biology, Czech Academy of Sciences, Květná 8, Brno, 60365, CZ

10 \*Corresponding author: [kamiljaron@gmail.com](mailto:kamiljaron@gmail.com)

## Abstract

Paternal genome elimination (PGE) - a type of reproduction in which males inherit but fail to pass on their father's genome - evolved independently in six to eight arthropod clades.

Thousands of species, including several important for agriculture, reproduce via this mode of  
15 reproduction. While some of the clades are well established PGE systems, the evidence in  
globular springtails (Symphyleona) remains elusive, even though they represent the oldest  
and most species rich clade putatively reproducing via PGE. We sequenced genomic DNA  
from whole bodies of *Allacma fusca* males with sufficiently high fractions (31 - 38%) of sperm  
20 to conclusively confirm that all the sperm carry one parental haplotype only. Although it is  
suggestive that the single haplotype present in sperm is maternally inherited, definitive  
genetic proof of the parent of origin is still needed. The genomic approach we developed  
allows for detection of genotypic differences between germline and soma in all species with  
sufficiently high fraction of germline in their bodies. This opens new opportunities for scans  
for reproductive modes in small animals.

## 25 Introduction

The mechanism of reproduction varies considerably across the tree of life (Bachtrog  
et al., 2014; Normark, 2003). Historically, cytological comparisons of male and female  
karyotypes have been used to determine the mode of reproduction in a species. However,  
cytological studies are labour intensive and not all species have visible sex-specific  
30 karyotypes. As a consequence, many species still have undefined reproductive systems. On  
the other hand, genomic techniques have been successfully deployed to identify sex  
chromosomes in many taxa such as Diptera (Anderson et al., 2020; Vicoso & Bachtrog,  
2015), and Lepidoptera (Fraïsse et al., 2017) and more recently to understand the exact  
form of parthenogenesis in species such as californian stick insects (Jaron et al., 2021), and  
35 bdelloid rotifers (Simion et al., 2021). Now, it is time to consider the ways we can use  
genomic techniques to study other modes of reproduction such as paternal genome  
elimination.

Paternal genome elimination is a reproduction system in which males develop from fertilised  
40 eggs, but pass to the next generation only the maternally inherited haplotype (see (Burt &  
Trivers, 2006) for a clear introduction to the topic). The inheritance pattern is exactly the  
same as in better known haplodiploidy (arrhenotoky), in which males develop from

unfertilized haploid eggs, but mechanistically they represent very different reproductive systems. Similar to haplodiploidy, there are only a few known transitions to PGE (six to  
45 eight), and PGE clades are frequently very old and diverse. Thousands of arthropod species reproduce via some form of paternal genome elimination including numerous agricultural pests (scale insects, Hessian fly, lucerne flea) and even pest control species (phytoseiid mites). However, the occurrence of PGE is likely significantly under-reported as it can be hard to confirm. It tends to occur in small arthropods that are poorly studied and hard to  
50 culture under laboratory conditions, making it challenging to study inheritance patterns. For example, PGE was only demonstrated in *Liposcelis* lice and human head and body lice (order Psocodea) very recently through genetic crosses tracking alleles over several generations, (de la Filia et al., 2018; Hodson et al., 2017) even though meiosis was known to be unusual in lice for decades prior to this (Cannon, 1922; Doncaster & Cannon, 1920).  
55 Because of the difficulty of inheritance studies, many of the reported cases are based on indirect evidence, usually cytogenetic observations of unusual chromosome behaviour (**Supplementary Table 1**).

Part of the reason PGE is difficult to identify, is that individual clades differ greatly in the  
60 mechanism of PGE, and hence require different types of evidence for confirmation (**Figure 1**). In all PGE species males develop from fertilized diploid eggs, and always exclusively transmit maternally inherited chromosomes to offspring. However, they differ in the processes leading to the elimination of paternal chromosomes. For example, in *Phytoseiidae* mites and some armored scale insects, the paternal genome is completely eliminated early  
65 in embryogenesis in a process called embryonic PGE (Brown, 1965; Nelson-Rees et al., 1980). The fact that males are completely haploid soon after fertilisation makes this type of PGE easy to detect in genetic and cytological studies, although it can be hard to distinguish from true haplodiploidy. The two can be distinguished, however, via carefully designed phenotypic or irradiation crosses (Helle et al., 1980; Hoy, 1979), by cytology of early  
70 embryogenesis (Nelson-Rees et al., 1980), or by observing whether unfertilised eggs develop into males (Häußermann et al., 2020).

|              | Clade                                                                                                                                 | Sex chromosomes                  | Parental chromosomes in male soma                  | Evidence                                                                       | Selected References                                                       |
|--------------|---------------------------------------------------------------------------------------------------------------------------------------|----------------------------------|----------------------------------------------------|--------------------------------------------------------------------------------|---------------------------------------------------------------------------|
| Collembola ? |  Symphyleona (globular springtails)                  | X <sub>1</sub> X <sub>2</sub> 00 | Autosomes retained                                 | Cytology of aberrant spermatogenesis; Single haplotype in sperm                | Dallai et al. 1999; Dallai et al. 2000; this manuscript                   |
| Insecta      |  Neococcidae (scale insects)                         | undifferentiated                 | Heterochmatized or eliminated early in development | irradiation crosses; cytogenetics; genetics; genomics                          | Brown and Nelson-Rees, 1961; Brown, 1965; de la Filia et al., 2021        |
|              |  Psocodea (booklice, parasitic lice)                 | undifferentiated                 | Heterochmatized or retained                        | cytogenetics; genetic crosses                                                  | Doncaster and Cannon, 1920; Hodson et. al, 2017; de la Filia et al., 2018 |
|              |  <i>Hypothenemus hampei</i> (coffee borer beetles)   | unknown                          | Heterochmatized                                    | cytogenetics; phenotypic crosses; genetic crosses                              | Brun et al., 1995;                                                        |
|              |  Cecidomyiidae (gall midges)                         | X <sub>1</sub> X <sub>2</sub> 00 | Autosomes retained                                 | phenotypical crosses; cytogenetics                                             | Gallun and Hatchett, 1969; White, 1973; Stuart and Hatchett, 1988         |
|              |  Sciaridae (dark-winged fungus gnats)                | X0                               | Autosomes retained                                 | phenotypical crosses; cytogenetics                                             | Metz, 1926; Metz, 1938; Gerbi, 1986                                       |
| Arachnida    |  Phytoseiidae (phytoseiid mites)                     | haplodiploidy                    | Eliminated early in development                    | genetic crosses; irradiation crosses; cytogenetics                             | Helle et al., 1978; Hoy, 1979; Nelson-Rees et al., 1980                   |
|              |  <i>Dicrocheles phalaenodectes</i> (moth ear mite) | unknown                          | Heterochmatized                                    | cytological observation of heterochromatised body; oviposition requires mating | Treat 1965                                                                |

**Figure 1. Clades with suggested paternal genome elimination (PGE) and evidence supporting it.** The cladogram shows the phylogenetic relationships between putative (marked by “?”) and confirmed PGE clades. Although all PGE clades exhibit transmission dynamics where paternally inherited chromosomes are not transmitted to offspring through males, the sex chromosome system and the treatment/expression of paternally inherited chromosomes in male somatic cells can differ between and within clades. A more detailed list of relevant literature is in **SM Table 1**. Two taxa without definitive proofs of PGE are marked “?”.

75  
80  
Image credits: mealybugs (scale insects) by Andrew J. Mongue, coffee borer beetles by Walker, K., phytoseiid mite by Mick Talbot.

85 In other types of PGE, males fully or partially retain their paternal genome throughout development and paternal chromosomes are excluded during spermatogenesis only, hence these types are known as germline PGE. While paternal chromosomes are retained, they form a dense heterochromatic body at the periphery of the cell nuclei for most scale insects (Brown, 1965; Ross et al., 2012), the coffee borer beetle (Brun et al., 1995), booklice (Hodson et al., 2017), and potentially in some Leptidoptera mites (Treat, 1965). This distinctive feature is not a formal test of PGE, but allows potential PGE species to be easily detected using cytological observation. It also means that males in these clades are mostly haploid in terms of gene expression, despite their diploid karyotype (Brun et al., 1995; de la Filia et al., 2021). A combination of embryonic and spermatogenic elimination is found in two dipteran families: fungus gnats, and gall midges. Males of these clades exclude one or two paternal chromosomes in early embryogenesis (usually referred to as X chromosomes), while retaining all other chromosomes in their soma. The remaining paternal chromosomes are lost during aberrant spermatogenesis. In fungus gnats and gall midges it has been shown by

90  
95

100 crosses that all the eliminated chromosomes in both embryogenesis and spermatogenesis  
are of paternal origin (Gallun & Hatchett, 1969; Metz, 1926, 1938; Stuart & Hatchett, 1988).  
Finally a similar type of PGE has been suggested to occur in globular springtails. However  
the evidence is solely based on unusual chromosome behaviour and no inheritance studies  
are available.

105 Globular springtails are a large and species-rich order with enormous importance for soil  
ecology (Hopkin, 1997). Their karyotype consists of four to five autosomes and two sex  
chromosomes referred as  $X_1$  and  $X_2$  (Dallai et al., 2000, 2004). As in PGE flies, male globular  
springtail zygotes are initially fully diploid, but during very early embryogenesis males  
eliminate one copy of the  $X_1$  and  $X_2$  chromosomes (**Supplementary figure 1**) (Dallai et al.,  
110 2000). Furthermore, the aberrant spermatogenesis also shows a great similarity to the two  
dipteran families. During meiosis I of spermatogenesis the two X chromosomes  
cosegregate, hence half of the secondary spermatocytes carry all six chromosomes and the  
other half contain the four autosomes only (**Figure 2**). The X chromosome lacking  
spermatocytes immediately degenerate, and only the spermatocytes with the complete  
115 chromosome set undergo a second meiotic division to form two haploid spermatids (Dallai et  
al., 2000). In a series of papers, Dallai and colleagues described this type of aberrant  
spermatogenesis in five globular springtail families, namely Dicyrtomidae (Dallai et al.,  
1999), Sminthuridae (Dallai et al., 2000), Bourletiellidae (Dallai et al., 2001), Sminthurididae  
and Katiannidae (Dallai et al., 2004). This is likely the ancestral state of the Symphypleona  
120 order. Hence, it is clear that one full haploid set of chromosomes gets eliminated during  
development (X chromosomes) and spermatogenesis (autosomes) of males. However, it  
remains unclear whether the chromosome elimination is random during meiosis or  
systematically dependent on the parental origin (i.e. PGE).

125 There is no distinct name for the putative sex chromosome constellation in globular  
springtails. It is best described as PGE  $X_0$ , although the absence of X chromosomes in  
males is not the primary sex determination. Other springtail orders in contrast have regular  
meiosis (Dallai et al., 1999) and  $X_0$  or XY sex determination (Hemmer, 1990; Núñez, 1962).

130 We investigated possible approaches to confirm PGE in globular springtails. First, we  
considered conducting genetic crosses of *Allacma fusca*, a relatively common and large  
globular springtail commonly found in woodland areas across Europe. However, wild-caught  
globular springtails are hard to maintain in lab conditions. Alternatively, genotyping a male  
and its sperm can at least inform us if all sperm contain a single haplotype only, presumably  
135 the maternal one. While investigating methods to efficiently sequence male sperm, we  
discovered male bodies contain a large fraction of sperm (up to 38% of cells) and  
sequencing whole bodies seems to be the most efficient way to sequence sperm, although it  
requires in-silico bioinformatics analysis to separate the effect of somatic and germline  
genomes in the sequencing library. With our innovative approach we demonstrated that the  
140 set of autosomes co-segregate with the  $X_1$  and  $X_2$  chromosomes, implying uniparental  
inheritance.

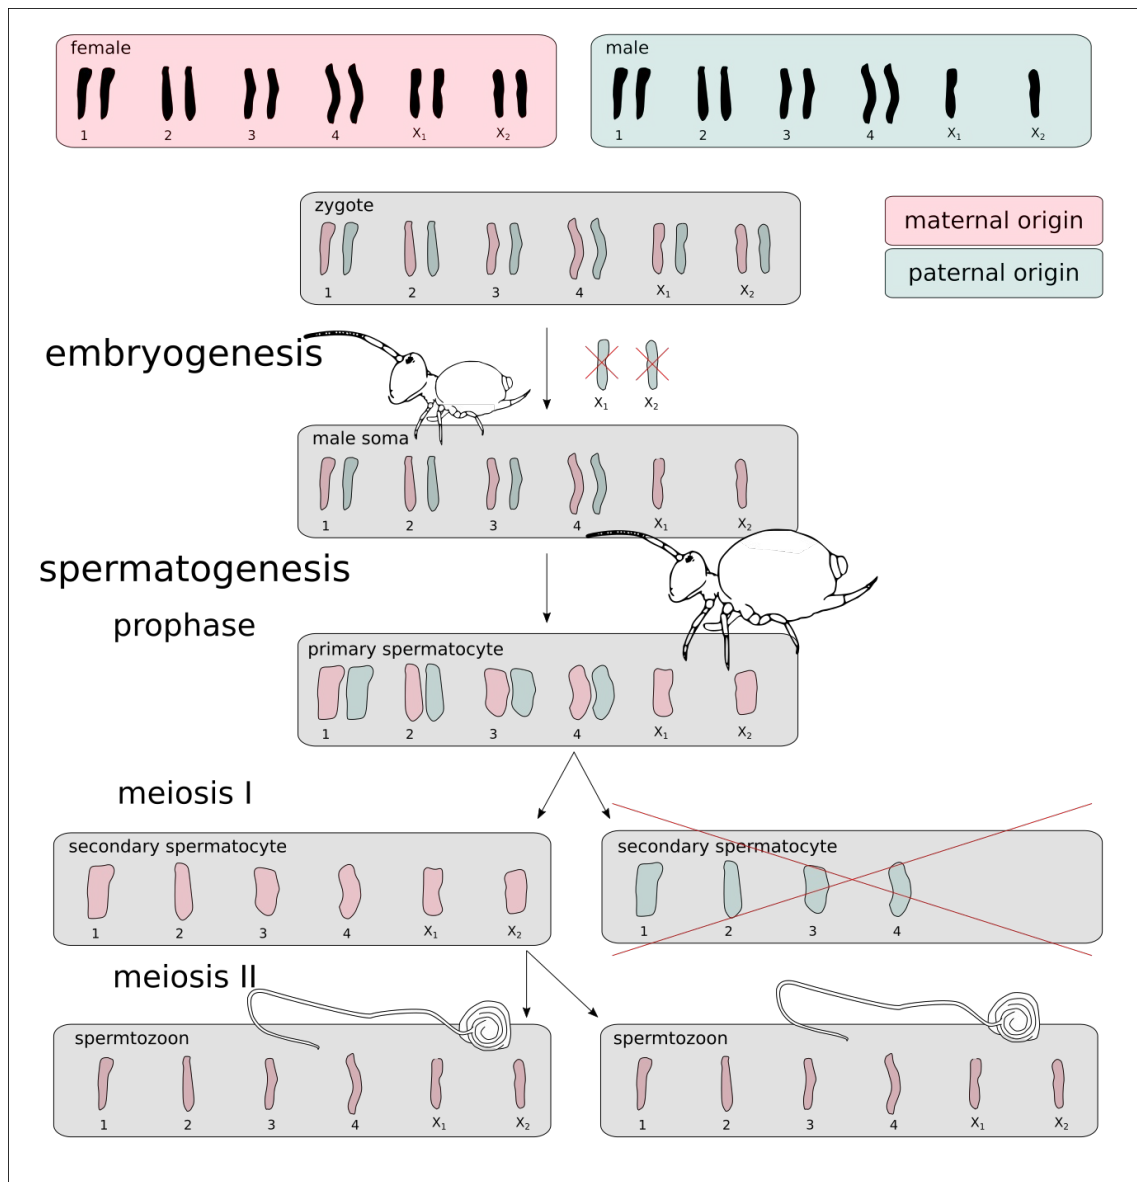

150 **Figure 2: Scheme of PGE in globular springtails.** Male springtail zygotes are initially diploid for all chromosomes. One copy of chromosomes  $X_1$  and  $X_2$  is excluded during early embryogenesis. Adult males then generate a half of their secondary spermatocytes with the remaining X chromosomes, and a half without  $X_1$  and  $X_2$  that degenerates immediately. The scheme and cartoonized shapes of chromosomes  $X_1$  and  $X_2$  are based on (Dallai et al., 2000). Note the spermatozoon “tail” is not flagellum, as flagellum is densely coiled, see (Dallai et al., 2009) for details. The coloring is assuming reproduction via paternal genome elimination as tested in this study.

## 155 Materials and Methods

### Springtails collected and sequenced

We used an assembly (GCA\_910591605.1) and sequencing reads (sample accession  
160 ERS6488033) we previously generated for a male *Allacma fusca* individual (Anderson et al.,  
2020). We also collected 12 additional *A. fusca* samples for resequencing. The sex of  
individual samples was determined from the modality of sequencing coverage and revealed  
11 of 12 resequenced samples were females (**SM Figure 1**). The resequenced male  
individual was sampled at Blackford Hill (sample id BH3-2, ERS6377982), Edinburgh,  
165 Scotland (55.924039, -3.196509). We isolated the DNA using Qiagen DNeasy Blood and  
tissue kit extraction protocol and sequenced using the Illumina HiSeq platform. The standard  
adapters and low quality bases were trimmed using skewer v0.2.2 with options -m pe -n -q  
26 -1 21 (Jiang et al., 2014). We used both the male and all female libraries to identify X-  
linked scaffolds. Although the reference genome is fragmented, reliable chromosomal  
170 assignments are available for 170.6 Mbp, representing 40.1% of the assembly span. In total,  
77.9 Mbp of scaffolds are X-linked, while 92.7 Mbp are autosomal (**SM Text 1**).

All analyses were also performed on the genome of an outgroup species *Orchesella cincta*  
(GCA\_001718145.1, (Faddeeva-Vakhrusheva et al., 2016)). Both male *O. cincta*  
175 resequencing data (ERS7711323) and chromosomal assignments were taken from  
(Anderson et al., 2020). *Orchesella cincta* is a distantly related springtail with XO sex  
determination (Hemmer, 1990) and therefore ideal as a negative control for this study.

### Calculation of k-mer coverages

180 All male sequencing libraries were initially subjected to quality control using kmer spectra  
analysis. We calculated the k-mer coverage histogram with  $k = 21$  using KMC3 (Kokot et al.,  
2017) and visualized it using GenomeScope 2.0 (Ranallo-Benavidez et al., 2020).  
GenomeScope fits a model estimating error rate, genome size and heterozygosity assuming  
185 all chromosomes are of the same ploidy. This assumption is clearly violated in male globular  
springtails, hence we disregarded the genome size and heterozygosity estimates for these  
samples and used the software only for characterising 1) the monoploid ( $1n$ ) k-mer coverage  
representing the two X chromosomes and the autosomal heterozygous loci, 2) the diploid  
( $2n$ ) k-mer coverage representing homozygous autosomal regions and 3) the error peak  
190 indicating overall quality of the sequencing run.

In sequencing libraries of a tissue with AAXO karyotype, the autosomes are expected to  
have exactly twice the coverage of X chromosomes (i.e. the library has evenly spaced  
peaks). However, k-mer coverages displayed unevenly spaced  $1n$  and  $2n$  peaks for the  
195 reference *A. fusca* male (**SM Figure 2A**), the BH3-2 *A. fusca* had insufficient coverage to  
confirm the pattern (**SM Figure 2C**), but the *O. cincta* male showed evenly spaced  $1n$  and  
 $2n$  peaks (**SM Figure 2E**). To clarify the signal and replicate the pattern we also estimated  
mapping coverage (see **Box 1** for the difference between the two).

## Calculation of mapping coverages

We mapped trimmed sequencing libraries to the softmasked reference genomes of *Allacma fusca* (GCA\_910591605.1) and *Orchesella cincta* respectively (GCA\_001718145.1). The reads  
205 were mapped using bowtie2 with the parameter `--very-sensitive-local` (Langmead & Salzberg, 2012). We used samtools depth to extract per base coverage (Li et al., 2009), and calculated per scaffold mean coverage. Then we estimated 1n and 2n coverage peaks using kernel smoothing with kernel width chosen by Sheather and Jones method (`bw = "SJ"`) (Sheather & Jones, 1991) while weighted by scaffold length (`weights = scf_tab$len / sum(scf_tab$len)`).  
210

This method resulted in both *A. fusca* males showing distinctively uneven peaks (**SM Figure 2B and D**), while the *O. cincta* male again showed the expected 1n and 2n coverage peaks. These findings prompted us to create a two tissue model that can explain the shift of relative  
215 positions of the two peaks.

### Box 1: Different types of sequencing coverages used in this manuscript

Sequencing coverage is the mean number of times every position in a genome is represented in reads. Sequencing coverage is usually estimated by dividing the total  
220 sequencing yield by the haploid genome size. However, in many cases, for genome analyses of non-model organisms the level of contamination in sequencing libraries; sequencing errors; and genome size is unknown. This can make estimating sequencing coverage challenging. Hence there are multiple other ways to measure and estimate sequencing coverage. These different measures have different properties and are used for  
225 different purposes. **K-mer coverage** is the mean number of occurrences of each unique continuous genomic sequence of length  $k$  in reads. K-mer decomposition is independent of a reference genome and the coverage is estimated by fitting a model to k-mer coverage histogram (Ranallo-Benavidez et al., 2020). This reference-free technique is well suited to observing raw signals from data unbiased by complicated procedures such as genome  
230 assembly. **Mapping coverage** is the mean number of reads mapping to each position of a haploid reference genome. It is dependent on the quality of the reference and quality of mapping. The main advantage is that reads of heterozygous sites as well as infrequent sequencing errors still typically map to the same position on the reference. Hence, this coverage is suited the best to estimate ploidy of each reference genomic region. **Allelic**  
235 **coverage** is also derived from sequencing reads mapped to the genome. However, the mapped reads usually have PCR duplicates marked and are subsequently used for calling variants. The coverage is then the number of non-duplicated reads supporting individual alleles. Sequencing errors do not contribute to this coverage.

For the sake of completeness, in theory, k-mer coverage ( $C_k$ ) is convertible to mapping  
240 coverage ( $C_m$ ) by a simple approximation

$$C_k \approx C_m \frac{R-k+1}{R}$$

Where  $k$  is the length of k-mer,  $R$  is the length of reads. However, in practice there are usually too many issues - no haploid reference is perfect and the mapping process is also  
245 dependent on many assumptions. Hence in practice the two measures need to be calculated independently.

## Two tissue model

250 The unevenly spaced mapping coverage (see **Box 1**) peaks of X chromosomes and  
autosomes implies the sequencing library contained tissues with various ploidies. A simple  
model that can explain the pattern is a two tissue mixture model - a mixture of a tissue with  
1:2 X to autosome ratio (e.g. male soma) and a tissue with 1:1 X to autosome ratio (e.g.  
255 secondary spermatocytes or sperms). Using the X-chromosome and autosome mapping  
coverage peaks, we can estimate the relative contribution of the two tissue types to the  
sequencing library (**Supplementary figure 5A**) and the fraction of the two tissues. Assuming  
the 1:1 tissue is haploid, the relative fraction of that tissue ( $f_h$ ) in the sequencing library is

$$f_h = 1 - \frac{(c_A - c_X)}{c_X},$$

260 where  $c_A$  is the mapping coverage of the autosomal peak, and  $c_X$  is the mapping coverage of  
the X chromosome peak.

The only described tissue with 1:1 X to autosome ratio in adult male globular springtails are  
primary and secondary spermatocytes, spermatids, and spermatozoon (Dallai et al., 2000).  
Hence, it is probably safe to assume this is the tissue that is causing the relative mapping  
265 coverage shift illustrated in **Supplementary figure 5B** (for alternative unsupported  
hypotheses tested to explain the 1n mapping coverage shift, see **SM Text 2**).

## Testing PGE

270 Sequencing a mixture of sperm and soma provides us a chance to test previously suggested  
paternal genome elimination (PGE) in globular springtails. The PGE inheritance model  
(**Figure 2**) predicts that the sperm contain only the maternally inherited haploid set of  
chromosomes ( $A_m X_m$ ). As all the autosomes present in the haploid sperm are of maternal  
origin, all the heterozygous autosomal loci should display a higher coverage support of  
275 maternal alleles compared to paternal. In the ideal case, we would like to compare coverage  
support of phased haplotypes, which is unfeasible with fragmented reference genomes and  
short read libraries. Instead, we separated the alleles of heterozygous autosomal variants to  
the “major” and “minor” alleles - representing the variants with higher and lower coverage  
support respectively. Under the PGE model the maternal and paternal alleles are expected  
280 to have vastly different coverage support, therefore the “major” alleles will be vastly of  
maternal origin, while the “minor” alleles will be vastly paternal. The fraction of possible  
misassigned variants was explored through modeling of sequencing coverages using  
negative binomial distributions with parameters estimated from expected sequencing  
coverages (**Figure 4**).

285 Furthermore, under the PGE model, the distribution of maternal allele coverage depths is  
expected to resemble the distribution of X-chromosome allele coverage depths. Due to a  
small fraction of misassigned alleles in males (as explained in the previous paragraph) the  
match is not expected to be exactly perfect. The expected levels of imperfect match were  
290 also estimated via the same set of simulated coverages.

We performed the same analysis on the genome of male *O. cincta* and two *A. fusca*



295 females. The two females only show the decomposition of autosomal heterozygous alleles in the case of frequent misassignment of maternal and paternal alleles (as they are generated from the same coverage distribution, **SM Figure 3**). The *O. cinca* male further allows the same comparison of decomposed allele coverages to the distribution of coverage of alleles found on the X chromosome.

300 Before calling variants we marked duplicates in the mapping files using picard MarkDuplicates (*Picard Toolkit*, 2019) and called variants using freebayes v1.3.2-dirty (Garrison & Marth, 2012) with stringent input base and mapping quality filters as well as required minimal allele coverage (`--standard-filters --min-coverage 5`), but we relaxed the priors of Hardy–Weinberg proportions as it might not be met in a PGE population (`--hwe-priors-off`), while assuming diploidy (`-p 2`). The raw variant calls were subsequently  
305 filtered for high quality variants (`-f "QUAL > 20"`) only using vcfliib from the vcfliib library version 1.0.0\_rc3 (Garrison et al., 2021) and sorted to autosomal and X-linked using a custom python script. The variants sorted to chromosomes were plotted using R scripts.

### 310 Independent estimate of the relative fraction of the haploid tissue

The described test for PGE requires moderate to high levels of heterozygosity to provide enough power to estimate the coverage distributions of the putatively maternal and paternal alleles. Low heterozygosity in combination with stringent parameters for SNP calling could cause low statistical power to test PGE via called variants.

315 To avoid the lack of power and any other potential biases introduced via SNP calling, we deployed an alternative approach as a supplementary analysis. For the two *Almaca* males we counted sequence states aligned under the GCA\_910591605.1 reference using samtools mpileup converted to matrix form with Popoolation2 mpileup2sync (Kofler et al., 2011). After  
320 filtering out scaffolds with evidence of copy-number variation between the males (**SM Figure 4**), we calculated minor frequencies  $p_p$  for all genomic positions with at least two states in the pileup. Then we examine the distribution of variant sites by minor allele frequency for both males. See **SM Text 4** for details.

325 As all the sperm is expected to contain only maternally inherited autosomes, the expected proportion  $p_p$  of paternal (green shaded in **Figure 2**) autosomes over all the body's cells

is  $\frac{1-f_h}{2-f_h}$ . The expected allele coverage ratio (site frequency) of the paternal state is  $p_p$ , this

is the minority state when  $f_h > 0$ , and

$$f_h = \frac{1-2p_p}{1-p_p}$$

330 which allows us to estimate the relative fraction of haploid tissue from the estimated allele coverage ratios. We also present this analysis for heterozygous SNP calls, allowing comparison of the two methods.

All scripts and materials are available online at <https://github.com/RossLab/genomic-evidence-of-PGE-in-globular-springtails>.

## Results

The analysis of trimmed sequencing libraries of the two *A. fusca* male individuals revealed that both have unexpected relative k-mer and mapping coverages of the X chromosomes compared to the autosomes (see **Box 1** for coverage definitions). In both cases the 1n coverage estimates were more than half of the diploid coverage estimate. We estimated the X-chromosome and autosomal mapping coverages in the BH3-2 male to be 18.35x and 29.65x respectively (**Figure 3**), deviating from the 1:2 ratio, under which we would expect the diploid coverage to be 36.7x (or haploid coverage of 14.8x). A remarkably similar uneven spacing of the X and autosomal peaks was observed in the reference *A. fusca* male for both k-mer and mapping coverages (57.7x and 95.2x), while in a strong contrast with a male sequencing library of a non-PGE species *O. cincta*, where the two coverage peaks were nearly perfectly spaced (**Supplementary figure 2**).

Using the coverage estimates and the two tissues mixture model (see **Methods** and **Supplementary figure 5**) we calculated the fraction of sperm cells in male *A. fusca* to be 35% (the reference male) and 38% (BH3-2). Furthermore, for the BH3-2 individual we estimated the expected allele coverages for paternal (11.3x) and maternal (18.35x) autosomes and X chromosomes (18.35x) (**Figure 3**).

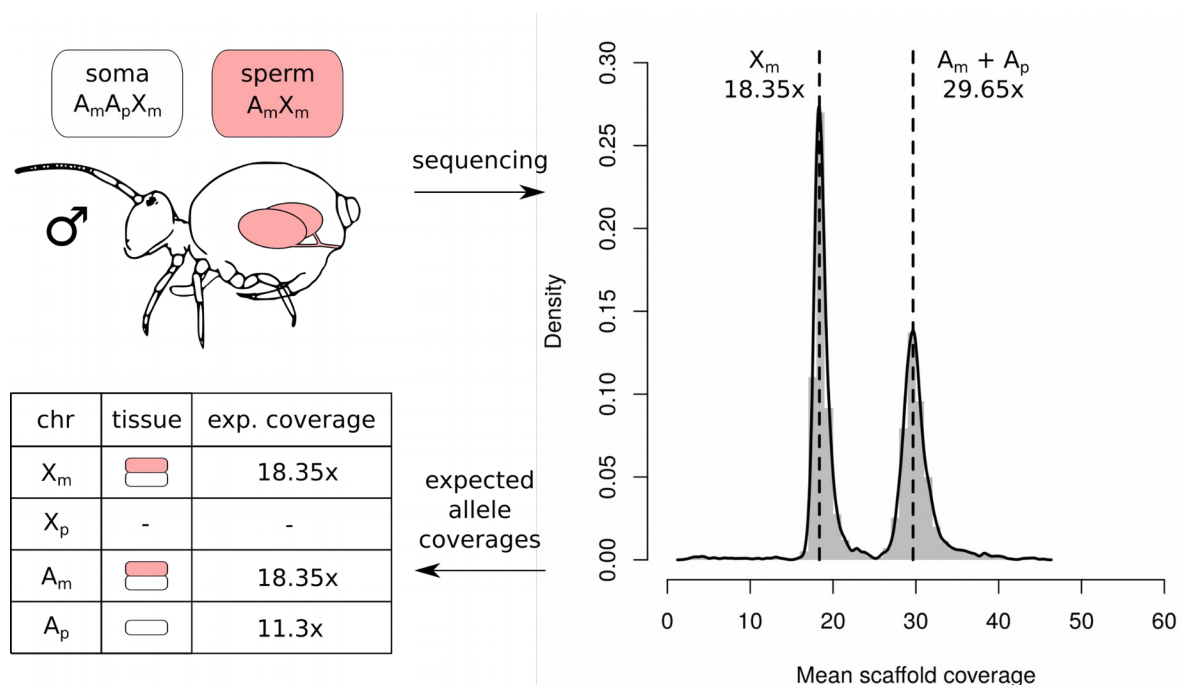

**Figure 3: Overview of expected coverages potentially explaining the shift of the coverage peaks.** PGE is expected to cause the shift of coverage peaks due to a significant proportion of sperm in the body, as indicated in cartoons (explained in greater detail in **Supplementary figure 5**). The table contains the expected paternal and maternal coverages of autosomes and X-chromosomes for the male resequencing individual BH3-2.

The expected coverages of maternal and paternal autosomes and X chromosomes were compared with the distribution of allelic coverages of variants on autosomes and X chromosomes. After quality filtering we identified 28,070 and 235,301 heterozygous variants anchored to chromosomes in the reference and BH3-2 individuals respectively (**SM Table**

2). The extremely low heterozygosity of the reference male reduces the power to use the sample for testing the PGE hypothesis and is discussed in **SM Text 3**. Of the BH3-2 anchored heterozygous variants 227,570 were located on autosomal scaffolds, while only 7,731 heterozygous variants on X-linked scaffolds, indicating low levels of false positives among variant calls (less than 100 false positives per 1Mbp). On the other hand, we identified 60,999 homozygous variant calls on the X linked scaffolds that were used for the comparison with allele coverages of the autosomal variants. The coverage supports of *A. fusca* male were contrasted to 1,959,258 heterozygous autosomal variants and 400,001 homozygous X-linked variants in the outgroup species *O. cincta* (non-PGE springtail).

We decomposed the male heterozygous autosomal variants in both samples to the “major” and “minor” alleles - representing the variants with higher and lower coverage support respectively. The mean coverage of maternal variants (18.35x) is expected to be higher compared to the coverage of paternal variants (11.3x), hence although it is possible some of the paternal variants will be by chance higher, this will affect only a very small fraction of the variants. To quantify the effect of misassigning variants by coverage, we simulated the coverage support of maternal and paternal alleles under the PGE model using the negative binomial distribution (**Figure 4A**). The simulation with 200000 variants showed that the probability of misassignment is 0.162 (Binom. CI: 0.1608748, 0.1641082). On the other hand, applying the same decomposition of heterozygous variants to “major” and “minor” in non-PGE species leads to ~0.5 of misassigned variants (by definition) (**Figure 4B**). In both cases the black distribution in the background represents the background distribution for the maternal variants. In the real data, we used the homozygous variants located on the X chromosomes to estimate the coverage distribution of monoploid maternal alleles. Under the PGE model, we expect it to roughly overlap with the “major” variant coverage peak (**Figure 4A**), contrasting to the non-PGE model where the expected distribution will be exactly in the middle of the “major” and “minor” coverage peaks (**Figure 4B**).

We confirm the coverage supports of “major” and “minor” autosomal variants in *A. fusca* male BH3-2 are close to the expected coverages (**Figure 4C**) generated from the two tissue mixture model (**Figure 3**). The fit is not perfect, probably due to problems with misassigned alleles. Furthermore, the distribution of “major” autosomal variants closely resembles the distribution of homozygous X-linked variants, with similar levels of disagreement compared to the simulated data (**Figure 4A**). Both comparisons together provide a strong support for the PGE model in *Allacma fusca*. The analysis of *A. fusca* shows a clearly different pattern to *O. cincta*, a springtail with standard spermatogenesis. The decomposed coverage supports display largely overlapping distributions and the coverage distribution of X-linked variants is nearly located intermediate between the peaks of “major” and “minor” allele coverages (**Figure 4D**), as predicted by the non-PGE model (**Figure 4B**). Note that the first coverage peak of X-linked variants displays spurious and unexpected coverages, which according to the genome profiling (**SM Figure 2E**) should be considered false positives.

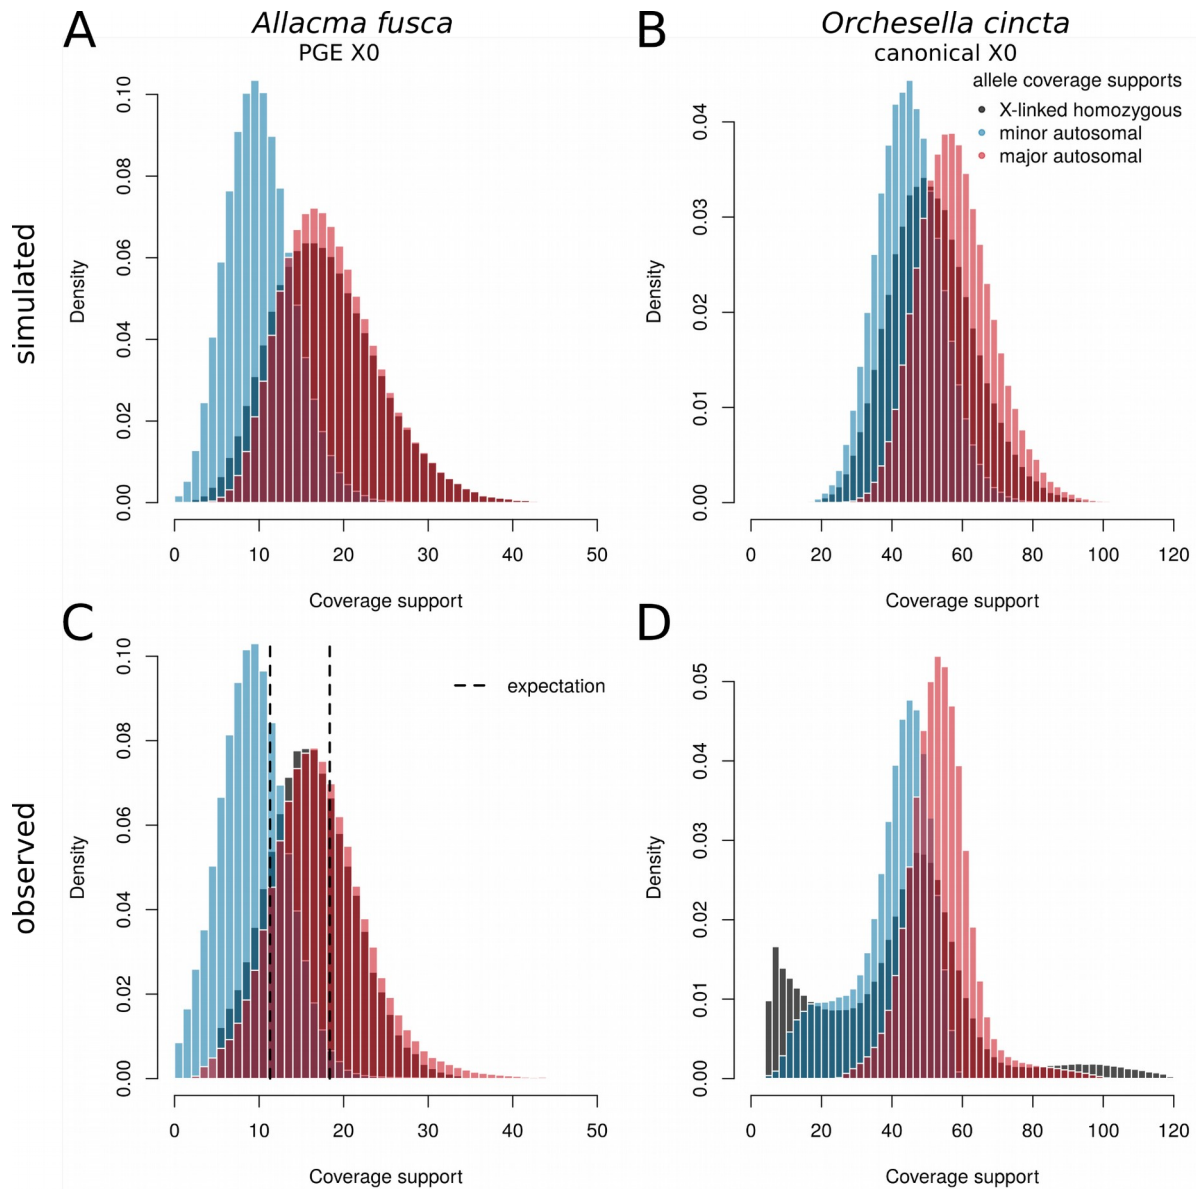

**Figure 4: Decomposed heterozygous allele coverage supports.** Coverage supports of the two alleles of heterozygous sites are decomposed to those with higher coverage (“major”, in red) and lower coverage (“minor”, in blue). These are compared to coverage supports of homozygous X-linked variants. Panels **A** and **B** are simulated allele coverages for a PGE X0 system and non-PGE X0 system. In PGE species (**A**), major alleles vastly represent maternal alleles and show similar coverage distributions to homozygous X-linked alleles (maternal haploid). In canonical X0 system (**B**) the decomposition also leads to bimodal distribution, however, the X-linked allele has an intermediate coverage peak in between of the two autosomal distributions. The observed coverage distributions in *Allacma fusca* (**C**) strongly support the PGE model. The major allele coverage support distribution closely reassembles the distribution of homozygous X-linked alleles as well as matching the expected coverage calculated from the 1n coverage shift (**Figure 3**). In contrast *Orchesella cincta* (**D**), a species with regular spermatogenesis and X0 sex determination, shows patterns consistent with the expected properties of canonical sexual X0 sex determination species with X-linked coverage support intermediate of the decomposed autosomal coverage supports.

425

We utilised an analysis of raw pileups to create an independent estimate of the fraction of the haploid tissue  $f_h$  from the estimated minor allele frequency of all genomic positions with two states located on scaffolds with no signs of copy number variation (See **SM Text 4** and **SM Figure 4**). This approach showed a higher abundance of bistates around coverage ratios 0.397 in Afus1 and 0.406 in BH3-2 (**SM Figure 5**), indicating that even the reference male shows some detectable heterozygous states, but with much noisier signal compared to BH3-2. The estimated fraction of sperm in the bodies from the paternal allele frequency  $p_p$  are 33.96% for Afus1 and 31.39% for BH3-2 individuals respectively.

## 435 Discussion

We estimated that a large proportion of a male adult *A. fusca* body (31 - 38%) consists of secondary spermatocytes, spermatids or mature sperm (from now on collectively referred to as sperm). Although the estimated fraction is relatively high, it is in agreement with high production of spermatophores by *Allacma fusca* (Dallai et al., 2009) and the estimate does not surpass that of other invertebrates. *Caenorhabditis elegans* can carry around 2000 germ cells, while their soma consist of precisely 959 cells (Sulston & Horvitz, 1977). Germ cells therefore represent ~67% of *C. elegans* cell count. A similar case is found among arthropods: Up to 75% of body cells in *Daphnia* males are sperm (Dufresne et al., 2019). It is important to note we specifically discuss the fraction of cells, not the biomass, as presumably, sperm are substantially smaller compared to other cell types in the body.

Taking advantage of the high sperm fraction, we demonstrated that all the sperm have exactly the same genotype which conclusively implies co-segregation of full chromosomal sets under the absence of recombination in this globular springtail. This conclusion was also supported by analyses of read pileups (**SM Text 4** and **SM Figure 5**). The analyses of pileups further revealed that the reference sample indeed also shows uneven coverage ratios of heterozygous alleles, although this signal was much weaker compared to the BH3-2 individual. We propose the reference individual could have reduced heterozygosity due to local inbreeding of the population that was sampled. Altogether, all results are in agreement with the PGE model (**Figure 2**) that has been previously proposed (Dallai et al., 2000).

We have shown a set of chromosomes is eliminated, but not whether the eliminated set is maternal or paternal. To provide definitive proof of PGE we would have to genotype both parents of a male as well as its sperm. Hypothetically, the eliminated chromosomes could be maternal. However, the elimination of maternal chromosomes during spermatogenesis has only even been observed in a rare form of androgenesis (Schwander & Oldroyd, 2016), a reproductive system in which males fertilize a female of a closely related sexual strain and cause elimination of the maternal genome as found in freshwater clam *Corbicula leana* (Komaru et al., 1998) or Australian carp gudgeons (Majtánová et al., 2021). However, this form of androgenesis requires a co-existence of lineages with canonical sexual reproduction with male androgenetic lineages, which is extremely unlikely in the case of globular springtails as the aberrant spermatogenesis seems to be present already in the common ancestor of globular springtails (Dallai et al., 1999, 2000, 2001, 2004). Paternal genome elimination on the other hand is a mode of reproduction that is conserved in at least six large

470 clades (**Figure 1**) and although with our data we also cannot completely exclude the  
possibility that the non-random chromosome elimination is associated with a different, as yet  
undescribed, evolutionary phenomena, paternal genome elimination is the only explanation  
compatible with known biology.

475 In particular, globular springtail reproduction most closely resembles the reproductive cycle  
of two dipteran families that also eliminate paternal chromosomes both in early  
spermatogenesis (what we call X chromosomes in these species) and during  
spermatogenesis (Gerbi, 1986; Metz, 1938). In both these two families females are  
frequently monogenic - each female produce broods of single sex only (Metz, 1931). So far  
480 this has not been tested in globular springtails, probably because they are both difficult to  
cultivate and show very little sexual dimorphism. Finally, the third genomic peculiarity found  
in both PGE fly families - they carry germ-line restricted chromosomes (Hodson et al., 2021;  
Metz, 1938), is a feature that is not shared in globular springtails as no differences between  
germ-line and soma karyotypes have been reported other than the aberrant  
485 spermatogenesis discussed in detail above.

Although we have tested this hypothesis in only a single globular springtail species *Allacma  
fusca*, the same type of aberrant spermatogenesis was demonstrated in seven species of  
five different families (**Supplementary table 1**) (Dallai et al., 1999, 2000, 2001, 2004). The  
490 most parsimonious explanation of the aberrant spermatogenesis in all the examined species  
is that PGE is the ancestral feature of globular springtails. Although we expect most of the  
globular springtails to retain this type of reproduction, there are multiple transitions to  
parthenogenetic reproduction (reviewed in (Chernova et al., 2010)). Other PGE clades  
usually show high conservation of this reproduction mode (Brown, 1965; Gerbi, 1986; Ross  
495 et al., 2012), the only known exception is found in louse. The human body louse seems to  
show a partial reversal to non-PGE sexual type of reproduction (de la Filia et al., 2018;  
McMeniman & Barker, 2005). Whether or not any globular springtail species have reverted  
to a more canonical type of reproduction is however an open question for further research.

500 Our study strongly suggests that globular springtails are the oldest and most species-rich  
clade reproducing via PGE. With 15,600 species estimated worldwide (Porco et al., 2014)  
globular springtails are a great clade to study the long term consequences of coping with  
PGE over hundreds of millions of years of evolution (Leo et al., 2019). This unusual mode of  
inheritance is likely to profoundly influence their evolutionary history. Recent theory suggests  
505 that haplodiploidy and PGE affect the evolution of reproductive isolation and increase  
diversification rates (Lohse & Ross, 2015; Patten et al., 2015). Springtails provide a great  
opportunity to test this theory as three of four springtail orders are species rich and allow us  
to estimate rates of diversification.

510 Paternal genome elimination also affects the dynamics of sexual conflict as shown in  
recently developed models (Hitchcock et al., 2021; Klein et al., 2021). Notably, it changes  
the relative role of X chromosomes and autosomes. Under PGE both X chromosomes and  
autosomes show bias in transmission between generations and sex alternation (see (Klein et  
al., 2021) for details), however, X chromosomes in globular springtails are also subjected to  
515 haploid selection in males. Unlike in species with normal diploid reproduction, the dominance  
of male beneficial alleles is the only factor that determines if they are more likely to get fixed  
on X chromosome (for recessive alleles) or anywhere in the genome (for dominant alleles)

(Klein et al., 2021). Therefore comparing the levels of sexual antagonism on X  
520 chromosomes and autosomes in globular springtails will allow the effect of dominance in  
sexual selection to be quantified, which has been a central question of sex chromosome  
evolution.

Besides rich biological interpretation, our study demonstrates the power of a careful  
525 bioinformatics analysis of whole genome sequencing data. The initial observation of  
suspiciously spaced coverage peaks was discovered during a routine quality control step  
using k-mer spectra analysis. Systematic scans for mixtures of two tissues in a single library  
could be more widely utilised to detect any peculiarities in reproduction that cause  
differences of karyotypes of male germline and soma such as the peculiar type of PGE in  
globular springtails.

## 530 Acknowledgements

First of all, we would like to thank Tanja Schwander for the invaluable suggestion of sperm  
being the cause of disrupted coverage ratio of autosomes and X chromosomes in males. We  
would also like to thank Andrew Mongue and the rest of Ross lab members for comments on  
535 early versions of this manuscript. Wytham Woods, City of Edinburgh Council, and Friends of  
the Hermitage of Braid for permission to collect springtails. CH would like to thank NSERC  
and the Darwin Trust of Edinburgh for postgraduate financial support. LR would like to  
acknowledge funding from the European Research Council Starting Grant (PGErepo) and  
from the Dorothy Hodgkin Fellowship DHFR1\180120. Financial support from  
NIH/GM121455 to SAG is gratefully acknowledged.

540

## References

- Anderson, N., Jaron, K. S., Hodson, C. N., Couger, M. B., Ševčík, J., Pirro, S., Ross, L., &  
Roy, S. W. (2020). Gene-rich X chromosomes implicate intragenomic conflict in the  
545 evolution of bizarre genetic systems. *BioRxiv*, 2020.10.04.325340. [https://doi.org/10/  
gjtw99](https://doi.org/10/gjtw99)
- Bachtrog, D., Mank, J. E., Peichel, C. L., Kirkpatrick, M., Otto, S. P., Ashman, T.-L., Hahn,  
M. W., Kitano, J., Mayrose, I., Ming, R., Perrin, N., Ross, L., Valenzuela, N., Vamosi,  
J. C., & Tree of Sex Consortium. (2014). Sex determination: Why so many ways of  
550 doing it? *PLoS Biology*, 12(7), e1001899. <https://doi.org/10/gfkh5h>
- Brown, S. W. (1965). Chromosomal survey of the armored and palm scale insects  
(Coccoidea: Diaspididae and Phoenicococcidae). *Hilgardia*, 36, 189–294.
- Brun, L. O., Stuart, J., Gaudichon, V., Aronstein, K., & French-Constant, R. H. (1995).

555 Functional haplodiploidy: A mechanism for the spread of insecticide resistance in an  
important international insect pest. *Proceedings Of The National Academy Of  
Sciences Of The United States Of America*, 92(21), 9861–9865.

<https://doi.org/10/b39wtm>

Burt, A., & Trivers, R. L. (2006). *Genes in Conflict*. Harvard University Press.

560 Cannon, H. G. (1922). Memoirs: A further Account of the Spermatogenesis of Lice. *Journal  
of Cell Science*, s2-66(264), 657–667. <https://doi.org/10/gm6t8m>

Chernova, N. M., Potapov, M. B., Savenkova, Yu. Yu., & Bokova, A. I. (2010). Ecological  
significance of parthenogenesis in collembola. *Entomological Review*, 90(1), 23–38.

<https://doi.org/10/c97kts>

565 Dallai, R., Fanciulli, P. P., Carapelli, A., & Frati, F. (2001). Aberrant spermatogenesis and  
sex determination in Bourletiellidae (Hexapoda, Collembola), and their evolutionary  
significance. *Zoomorphology*, 120(4), 237–245. <https://doi.org/10/c7fr66>

Dallai, R., Fanciulli, P. P., & Frati, F. (1999). Chromosome elimination and sex determination  
in springtails (Insecta, Collembola). *Journal of Experimental Zoology*, 285(3), 215–  
225. <https://doi.org/10/cq83zc>

570 Dallai, R., Fanciulli, P. P., & Frati, F. (2000). Aberrant spermatogenesis and the peculiar  
mechanism of sex determination in symphypleonan Collembola. *Journal of Heredity*,  
91(5), 351–358. <https://doi.org/10/dkgjmt>

Dallai, R., Fanciulli, P. P., & Frati, F. (2004). New data on the aberrant spermatogenesis of  
Collembola. *Pedobiologia*, 48(5–6), 487–492. <https://doi.org/10/bs7rmg>

575 Dallai, R., Zizzari, Z. V., & Fanciulli, P. P. (2009). Different sperm number in the  
spermatophores of *Orchesella villosa* (Geoffroy) (Entomobryidae) and *Allacma fusca*  
(L.) (Sminthuridae). *Arthropod Structure & Development*, 38(3), 227–234.

<https://doi.org/10/fk6gvz>

580 de la Filia, A. G., Andrewes, S., Clark, J. M., & Ross, L. (2018). The unusual reproductive  
system of head and body lice (*Pediculus humanus*). *Medical and Veterinary  
Entomology*, 32(2), 226–234. <https://doi.org/10/gf22ks>



de la Folia, A. G., Mongue, A. J., Dorrens, J., Lemon, H., Laetsch, D. R., & Ross, L. (2021).

Males That Silence Their Father's Genes: Genomic Imprinting of a Complete Haploid Genome. *Molecular Biology and Evolution*, 38(6), 2566–2581.

585 <https://doi.org/10/gm74zf>

Doncaster, L., & Cannon, H. G. (1920). Memoirs: On the Spermatogenesis of the Louse (Pediculus Corporis and P. Capitis), With Some Observations on the Maturation of the Egg. *Journal of Cell Science*, s2-64(255), 303–325. <https://doi.org/10/gm6t8k>

Dufresne, F., Belzile, C., McKindsey, C., & Beaudreau, N. (2019). Sperm number assessed  
590 by flow cytometry in species of Daphnia (Crustacea, Cladocera). *Invertebrate Biology*, 138(3), e12261. <https://doi.org/10/gf759v>

Faddeeva-Vakhrusheva, A., Derks, M. F. L., Anvar, S. Y., Agamennone, V., Suring, W., Smit, S., van Straalen, N. M., & Roelofs, D. (2016). Gene Family Evolution Reflects Adaptation to Soil Environmental Stressors in the Genome of the Collembolan  
595 *Orchesella cincta*. *Genome Biology and Evolution*, 8(7), 2106–2117.

<https://doi.org/10/f8zg59>

Fraïsse, C., Picard, M. A. L., & Vicoso, B. (2017). The deep conservation of the Lepidoptera Z chromosome suggests a non-canonical origin of the W. *Nature Communications*, 8(1), 1486. <https://doi.org/10/gcmbnr>

600 Gallun, R. L., & Hatchett, J. H. (1969). Genetic Evidence of Elimination of Chromosomes in the Hessian Fly<sup>1,2</sup>. *Annals of the Entomological Society of America*, 62(5), 1095–1101. <https://doi.org/10/gm74zd>

Garrison, E., Kronenberg, Z. N., Dawson, E. T., Pedersen, B. S., & Prins, P. (2021). *Vcflib and tools for processing the VCF variant call format* (p. 2021.05.21.445151).

605 <https://doi.org/10.1101/2021.05.21.445151>

Garrison, E., & Marth, G. (2012). Haplotype-based variant detection from short-read sequencing. *ArXiv:1207.3907 [q-Bio]*. <http://arxiv.org/abs/1207.3907>

Gerbi, S. A. (1986). Unusual Chromosome Movements in Sciarid Flies. In W. Hennig (Ed.), *Germ Line—Soma Differentiation* (pp. 71–104). Springer.

- 610 [https://doi.org/10.1007/978-3-540-39838-7\\_2](https://doi.org/10.1007/978-3-540-39838-7_2)  
Häußermann, C. K., Giacobino, A., Munz, R., Ziegelmann, B., Palacio, M. A., & Rosenkranz, P. (2020). Reproductive parameters of female *Varroa destructor* and the impact of mating in worker brood of *Apis mellifera*. *Apidologie*, 51(3), 342–355.  
<https://doi.org/10/gmw43n>
- 615 Helle, W., Bolland, H. R., & Heitmans, W. R. B. (1980). Chromosomes and types of parthenogenesis in the false spider mites (Acari: Tenuipalpidae). *Genetica*, 54(1), 45–50. <https://doi.org/10/brsjf9>  
Hemmer, W. (1990). Karyotype differentiation and chromosomal variability in springtails (Collembola, Insecta). *Biology and Fertility of Soils*, 9(2), 119–125. <https://doi.org/10/dkqp9j>
- 620 Hitchcock, T. J., Gardner, A., & Ross, L. (2021). Sexual antagonism in haplodiploids. *BioRxiv*, 2021.03.26.437233. <https://doi.org/10/gm8ds2>  
Hodson, C. N., Hamilton, P. T., Dilworth, D., Nelson, C. J., Curtis, C. I., & Perlman, S. J. (2017). Paternal Genome Elimination in *Liposcelis* Booklice (Insecta: Psocodea). *Genetics*, 206(2), 1091–1100. <https://doi.org/10/gfzgjf>
- 625 Hodson, C. N., Jaron, K. S., Gerbi, S., & Ross, L. (2021). Evolution of gene-rich germline restricted chromosomes in black-winged fungus gnats through introgression (Diptera: Sciaridae). *BioRxiv*, 2021.02.08.430288. <https://doi.org/10/gmhww4>  
Hopkin, S. P. (1997). *Biology of Springtails (Insecta: Collembola)*. Oxford University Press.
- 630 Hoy, M. A. (1979). Parahaploidy of the “Arrhenotokous” Predator, *Metaseiulus Occidentalis* (acarina: Phytoseiidae) Demonstrated by X-Irradiation of Males. *Entomologia Experimentalis et Applicata*, 26(1), 97–104. <https://doi.org/10/cmjzk7>  
Jaron, K. S., Parker, D. J., Anselmetti, Y., Van, P. T., Bast, J., Dumas, Z., Figuet, E., François, C. M., Hayward, K., Rossier, V., Simion, P., Robinson-Rechavi, M., Galtier, N., & Schwander, T. (2021). *Convergent consequences of parthenogenesis on stick insect genomes* (p. 2020.11.20.391540). <https://doi.org/10.1101/2020.11.20.391540>
- 635 Jiang, H., Lei, R., Ding, S.-W., & Zhu, S. (2014). Skewer: A fast and accurate adapter

- trimmer for next-generation sequencing paired-end reads. *BMC Bioinformatics*, 15(1), 182. <https://doi.org/10/gb8wj4>
- 640 Klein, K., Kokko, H., & ten Brink, H. (2021). Disentangling Verbal Arguments: Intralocus Sexual Conflict in Haplodiploids. *The American Naturalist*, 000–000. <https://doi.org/10/gm8dsz>
- Kofler, R., Pandey, R. V., & Schlötterer, C. (2011). PoPoolation2: Identifying differentiation between populations using sequencing of pooled DNA samples (Pool-Seq). *Bioinformatics*, 27(24), 3435–3436. <https://doi.org/10/cjmkn5>
- 645 Kokot, M., Długosz, M., & Deorowicz, S. (2017). KMC 3: Counting and manipulating k-mer statistics. *Bioinformatics*, 33(17), 2759–2761. <https://doi.org/10/f96gjp>
- Komaru, A., Kawagishi, T., & Konishi, K. (1998). Cytological evidence of spontaneous androgenesis in the freshwater clam *Corbicula leana* Prime. *Development Genes and Evolution*, 208(1), 46–50. <https://doi.org/10/dz4n4n>
- 650 Langmead, B., & Salzberg, S. L. (2012). Fast gapped-read alignment with Bowtie 2. *Nature Methods*, 9(4), 357–359. <https://doi.org/10/gd2xzn>
- Leo, C., Carapelli, A., Cicconardi, F., Frati, F., & Nardi, F. (2019). Mitochondrial Genome Diversity in Collembola: Phylogeny, Dating and Gene Order. *Diversity*, 11(9), 169. <https://doi.org/10/ggcdpd>
- 655 Li, H., Handsaker, B., Wysoker, A., Fennell, T., Ruan, J., Homer, N., Marth, G., Abecasis, G., Durbin, R., & 1000 Genome Project Data Processing Subgroup. (2009). The Sequence Alignment/Map format and SAMtools. *Bioinformatics*, 25(16), 2078–2079. <https://doi.org/10/ff6426>
- 660 Lohse, K., & Ross, L. (2015). What haplodiploids can teach us about hybridization and speciation. *Molecular Ecology*, 24(20), 5075–5077. <https://doi.org/10/f7wbww>
- Majtánová, Z., Dedukh, D., Choleva, L., Adams, M., Ráb, P., Unmack, P. J., & Ezaz, T. (2021). Uniparental Genome Elimination in Australian Carp Gudgeons. *Genome Biology and Evolution*, 13(6). <https://doi.org/10/gnbjts>
- 665 McMeniman, C. J., & Barker, S. C. (2005). Transmission ratio distortion in the human body

louse, *Pediculus humanus* (Insecta: Phthiraptera). *Heredity*, 96(1), 63–68.

<https://doi.org/10/cd936g>

Metz, C. W. (1926). Genetic Evidence of a Selective Segregation of Chromosomes in *Sciara* (Diptera). *Proceedings of the National Academy of Sciences*, 12(12), 690–692.

670 <https://doi.org/10/d97phw>

Metz, C. W. (1931). Unisexual Progenies and Sex Determination in *Sciara*. *The Quarterly Review of Biology*, 6(3), 306–312. <https://doi.org/10/dzfwck>

Metz, C. W. (1938). Chromosome behavior, inheritance and sex determination in *Sciara*. *American Naturalist*, 72, 485–520. <https://doi.org/10/d9nw39>

675 Nelson-Rees, W. A., Hoy, M. A., & Roush, R. T. (1980). Heterochromatinization, chromatin elimination and haploidization in the parahaploid mite *Metaseiulus occidentalis* (Nesbitt) (Acarina: Phytoseiidae). *Chromosoma*, 77(3), 263–276.

<https://doi.org/10/cspk6x>

Normark, B. B. (2003). The evolution of alternative genetic systems in insects. *Annual Review of Entomology*, 48, 397–423. <https://doi.org/10/bggbbqz>

680

Núñez, O. (1962). Cytology of *Collembola*. *Nature*, 194(4832), 946–947.

<https://doi.org/10/bwpxxc>

Patten, M. M., Carioscia, S. A., & Linnen, C. R. (2015). Biased introgression of mitochondrial and nuclear genes: A comparison of diploid and haplodiploid systems. *Molecular Ecology*, 24(20), 5200–5210. <https://doi.org/10/gf4ftd>

685

*Picard toolkit*. (2019). Broad Institute, GitHub repository:

<http://broadinstitute.github.io/picard/>. <http://broadinstitute.github.io/picard/>

Porco, D., Skarżyński, D., Decaëns, T., Hebert, P. D. N., & Deharveng, L. (2014). Barcoding the *Collembola* of Churchill: A molecular taxonomic reassessment of species diversity in a sub-Arctic area. *Molecular Ecology Resources*, 14(2), 249–261. <https://doi.org/10/f5svff>

690

[doi.org/10/f5svff](https://doi.org/10/f5svff)

Ranallo-Benavidez, T. R., Jaron, K. S., & Schatz, M. C. (2020). GenomeScope 2.0 and Smudgeplot for reference-free profiling of polyploid genomes. *Nature*

*Communications*, 11(1), 1432. <https://doi.org/10/ggrbdk>

695 Ross, L., Shuker, D. M., Normark, B. B., & Pen, I. (2012). The role of endosymbionts in the evolution of haploid-male genetic systems in scale insects (Coccoidea). *Ecology and Evolution*, 2(5), 1071–1081. <https://doi.org/10/f4jdfb>

Schwander, T., & Oldroyd, B. P. (2016). Androgenesis: Where males hijack eggs to clone themselves. *Philosophical Transactions of the Royal Society of London B: Biological Sciences*, 371(1706), 20150534. <https://doi.org/10/gfxd92>

700 Sheather, S. J., & Jones, M. C. (1991). A Reliable Data-Based Bandwidth Selection Method for Kernel Density Estimation. *Journal of the Royal Statistical Society: Series B (Methodological)*, 53(3), 683–690. <https://doi.org/10/gftr8>

Simion, P., Narayan, J., Houtain, A., Derzelle, A., Baudry, L., Nicolas, E., Arora, R., Cariou, M., Cruaud, C., Gaudray, F. R., Gilbert, C., Guiglielmoni, N., Hespeels, B., Kozłowski, D. K. L., Labadie, K., Limasset, A., Llíros, M., Marbouty, M., Terwagne, M., ... Van Doninck, K. (2021). Chromosome-level genome assembly reveals homologous chromosomes and recombination in asexual rotifer *Adineta vaga*. *Science Advances*, 7(41), eabg4216. <https://doi.org/10.1126/sciadv.abg4216>

710 Stuart, J. J., & Hatchett, J. H. (1988). Cytogenetics of the Hessian Fly: II. Inheritance and Behavior of Somatic and Germ-Line-Limited Chromosomes. *Journal of Heredity*, 79(3), 190–199. <https://doi.org/10/gm74zb>

Sulston, J. E., & Horvitz, H. R. (1977). Post-embryonic cell lineages of the nematode, *Caenorhabditis elegans*. *Developmental Biology*, 56(1), 110–156. <https://doi.org/10/b48mn4>

Treat, A. E. (1965). Sex-Distinctive Chromatin and the Frequency of Males in the Moth Ear Mite. *Journal of the New York Entomological Society*, 73(1), 12–18.

Vicoso, B., & Bachtrog, D. (2015). Numerous Transitions of Sex Chromosomes in Diptera. *PLoS Biology*, 13(4), e1002078. <https://doi.org/10/f7crnn>

720
